# Supplementary material for: Wetting and drying cycles, organic amendments, and gypsum play a key role in structure formation and stability of sodic Vertisols
Source: Copernicus journal article supplement (doi:10.5194/soil-9-141-2023), 2023-03-03
Supplement: Supplementary file 1 [file soil-9-141-2023-supplement.pdf]

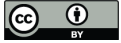

*Supplement of*

**Wetting and drying cycles, organic amendments, and gypsum play a key role in structure formation and stability of sodic Vertisols**

**Sara Niaz et al.**

*Correspondence to:* J. Bernhard Wehr (b.wehr@uq.edu.au)

The copyright of individual parts of the supplement might differ from the article licence.

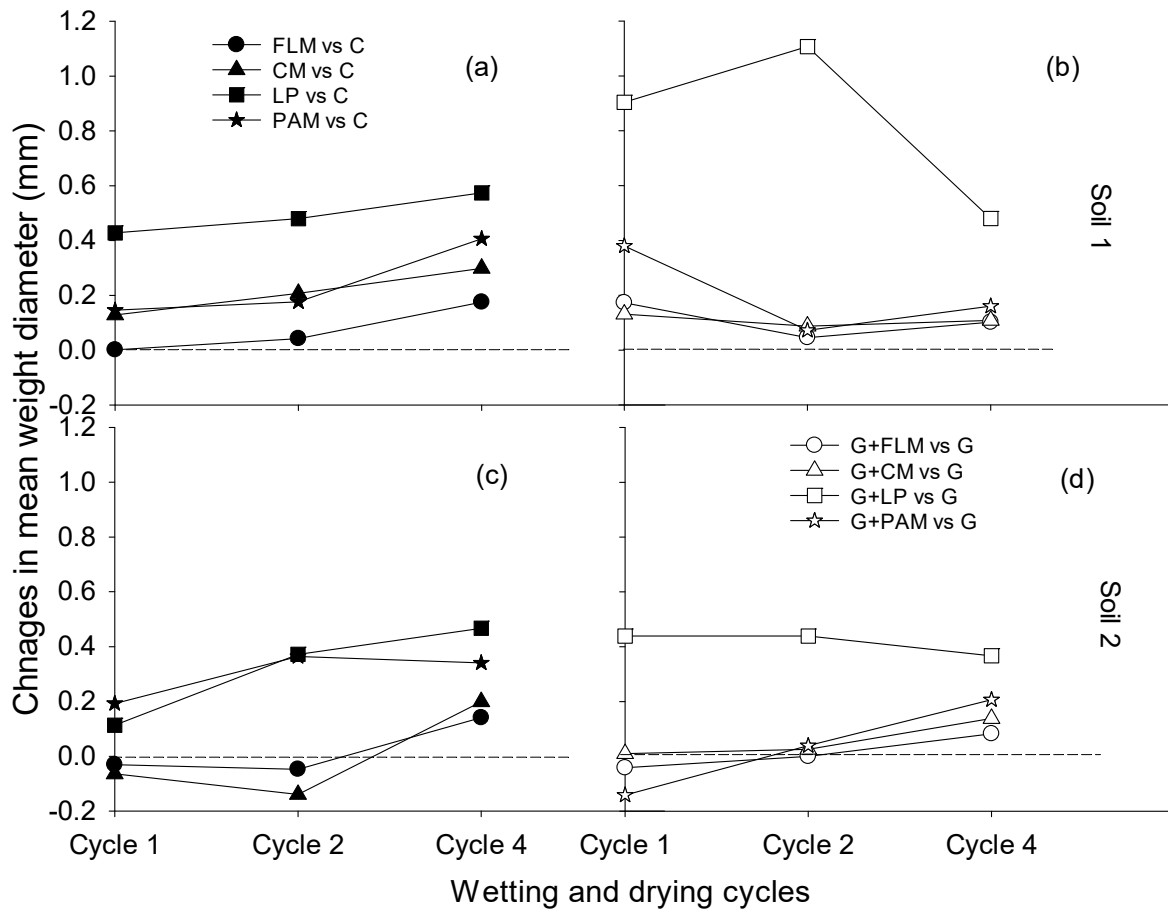

Fig. S1. Changes in mean weight diameter (MWD) of soil samples after addition of amendments during four alternate WD cycles in Soil 1 (a, b) and, Soil 2 (c, d). The treatments are C: control, G: gypsum, PAM: anionic polyacrylamide, FLM: feedlot manure, CM: chicken manure, LP: lucerne pellets. Data in graphs A and C refer to changes in MWD of Soil 1 and Soil 2 as compared to C (MWD compared to C = 0), and data in graphs B and D refer to changes in MWD of Soil 1 and Soil 2 as compared to G (MWD compared to G = 0).

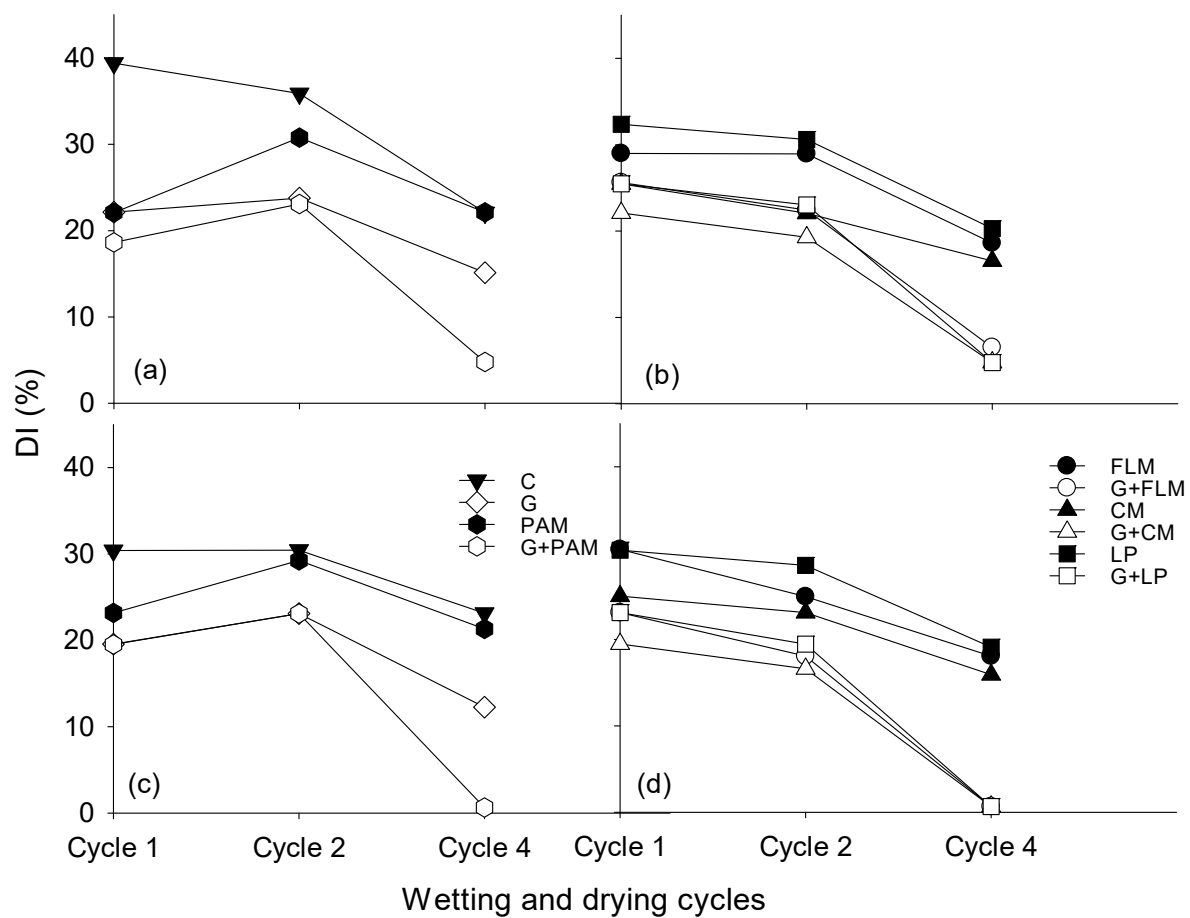

Fig. S2. Dispersion Index of soil samples after addition of amendments during four alternate WD cycles in Soil 1 (a, b) and, Soil 2 (c, d). The treatments are C: control, G: gypsum, PAM: anionic polyacrylamide, FLM: feedlot manure, CM: chicken manure, LP: lucerne pellets.

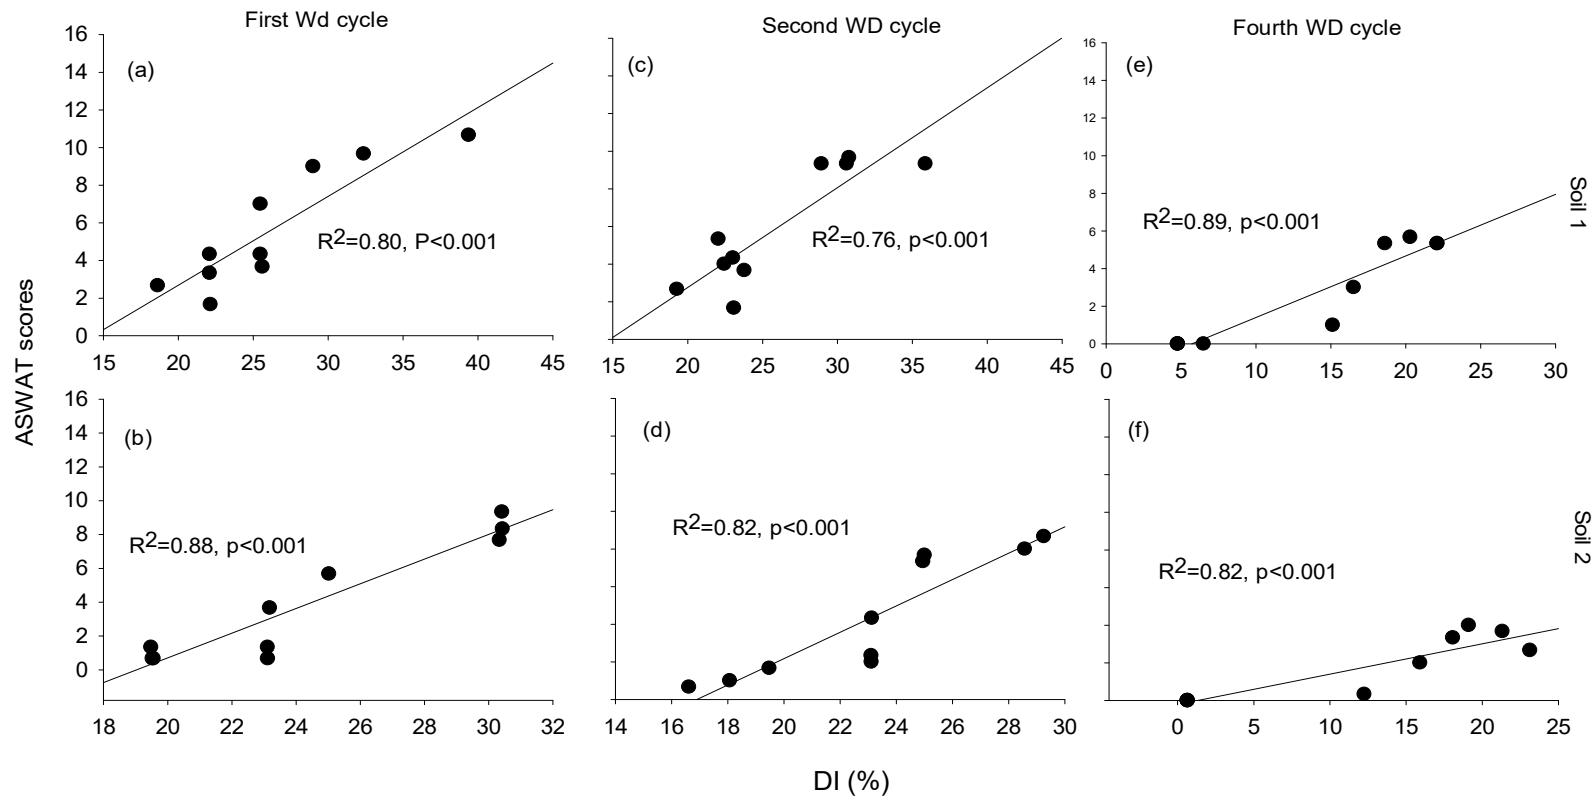

Fig. S3. Relationship of clay dispersion as measured by ASWAT with DI; Soil 1 (a, c, and e) Soil 2 (b, d, and f). Graph (a) and (b) represents the relationship between ASWAT, and DI after first wetting and drying (WD) cycle. Graph (c) and (d) represents the relationship between ASWAT and DI after second WD cycle, and graph (e) and (f) represents the relationship between ASWAT and DI after fourth WD cycle. The line on each graph is showing the linear regression line. Each point on graph represents the means of three replicates of each of ten treatments.

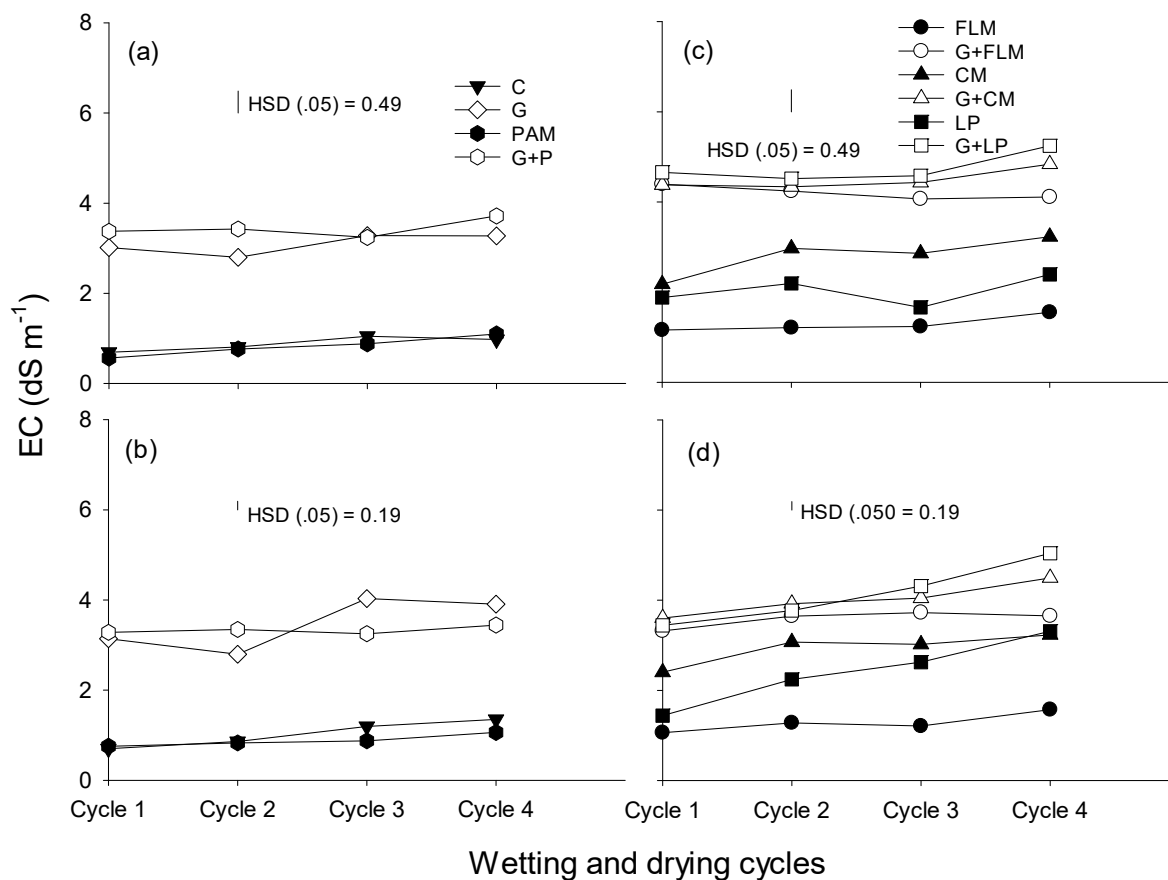

Fig. S4. The electrical conductivity (EC) of soil solutions after addition of amendments during four alternate WD cycles Soil 1 (A, C) and, Soil 2 (B, D). The treatments are C: control, G: gypsum, PAM: anionic polyacrylamide, FLM: feedlot manure, CM: chicken manure, LP: lucerne pellets. Vertical bars represent Tukey's honest significant difference (HSD) values at  $P=0.05$  for pairwise treatment comparisons among four WD cycles

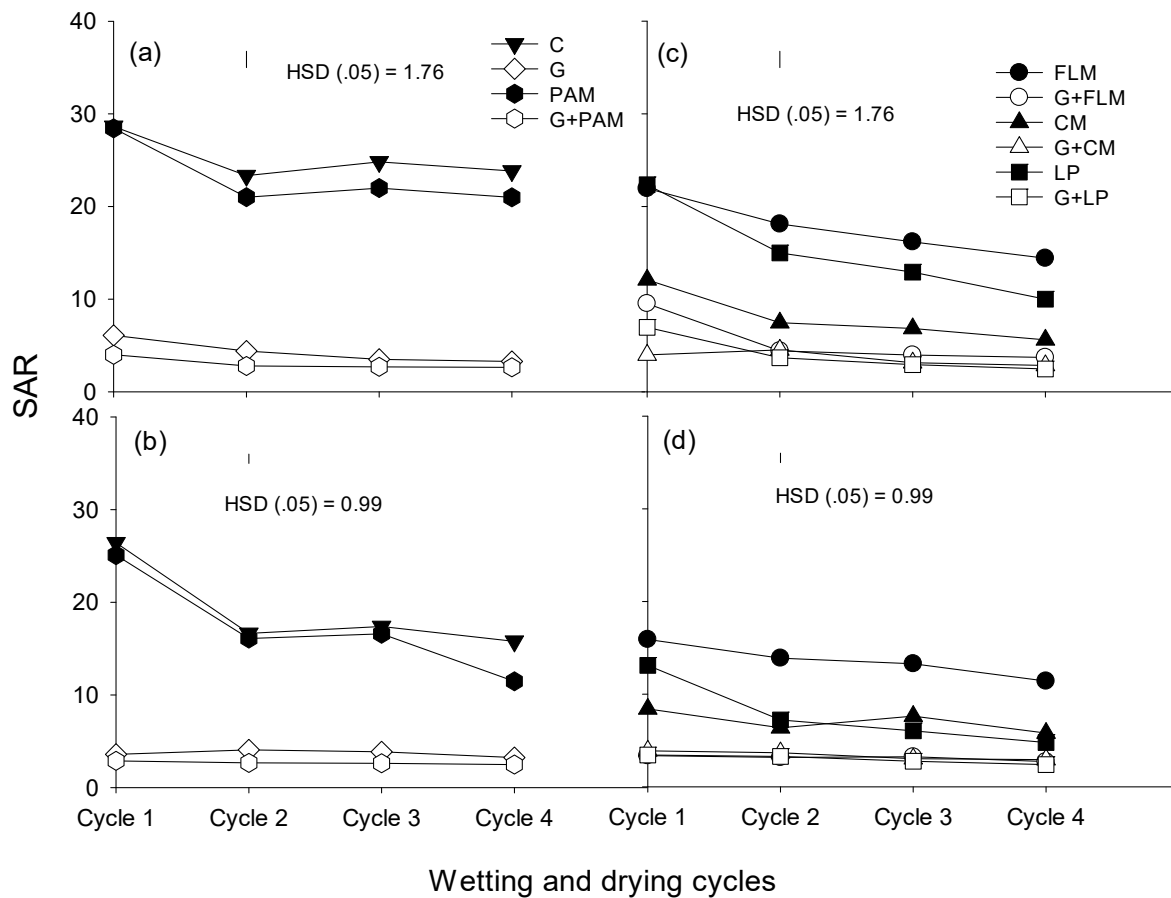

Fig. S5. The sodium adsorption ratio (SAR) of soil solutions after addition of amendments during four alternate WD cycles in Soil 1 (A, C) and, Soil 2 (B, D). The treatments are C: control, G: gypsum, PAM: anionic polyacrylamide, FLM: feedlot manure, CM: chicken manure, LP: lucerne pellets. Vertical bars represent Tukey's honest significant difference (HSD) values at  $P=0.05$  for pairwise treatment comparisons among four WD cycles.

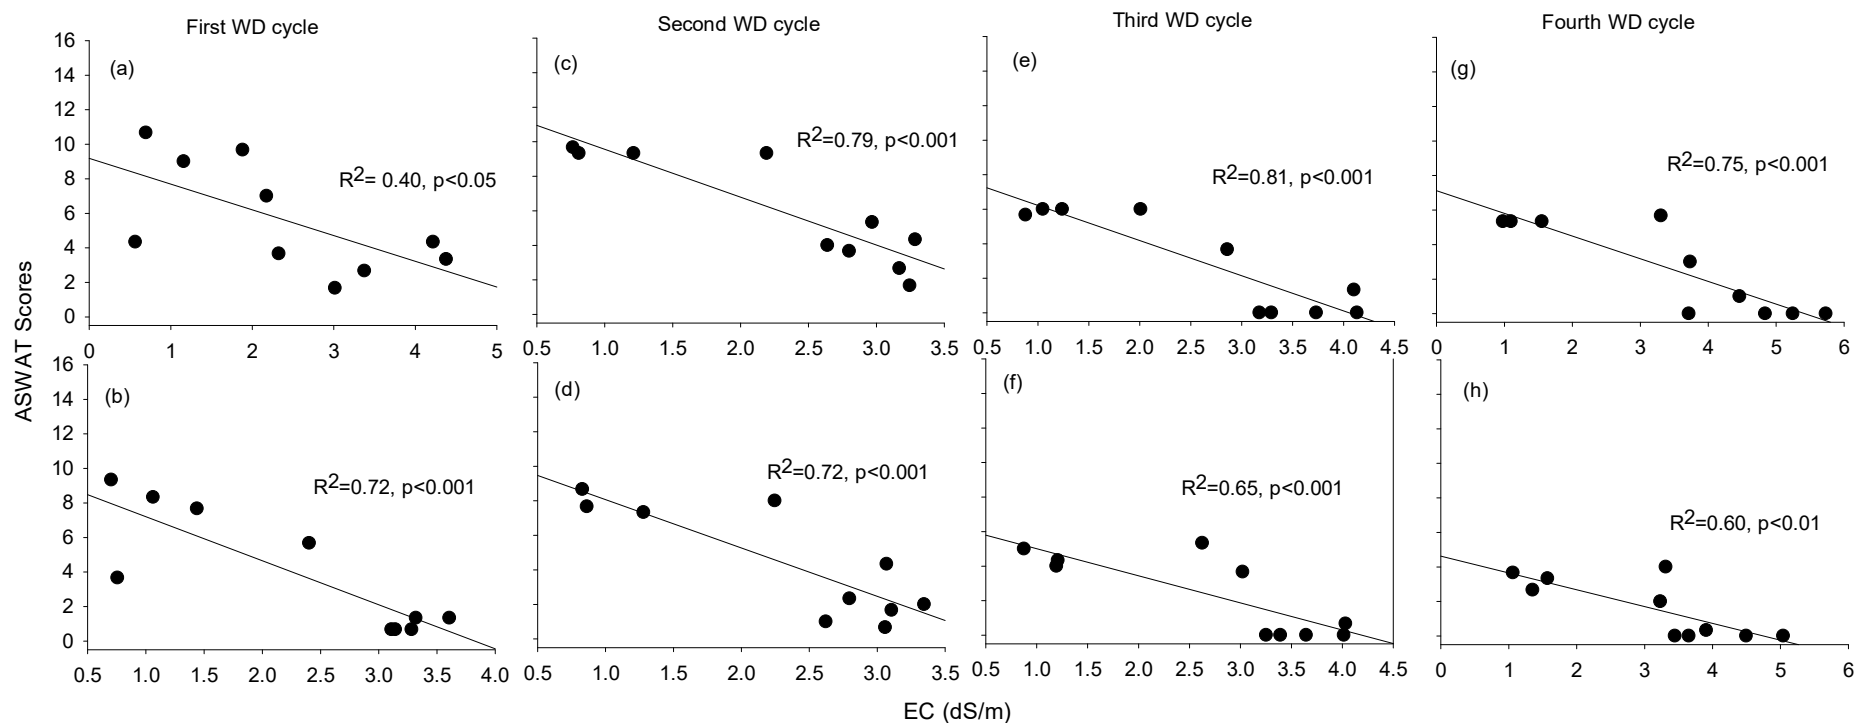

Fig. S6. Relationship of clay dispersion as measured by ASWAT with EC; Soil 1 (a, c, e, and g) Soil 2 (b, d, f, and h). Graph (a) and (b) represents the relationship between ASWAT, and EC after first wetting and drying (WD) cycle. Graph (c) and (d) represents the relationship between ASWAT and EC after second WD cycle. Graph (e) and (f) represents the relationship between ASWAT and EC after third WD cycle, and graph (g) and (h) represents the relationship between ASWAT and EC after fourth WD cycle. The line on each graph is showing the linear regression line. Each point on graph represents the means of three replicates of each of ten treatments.

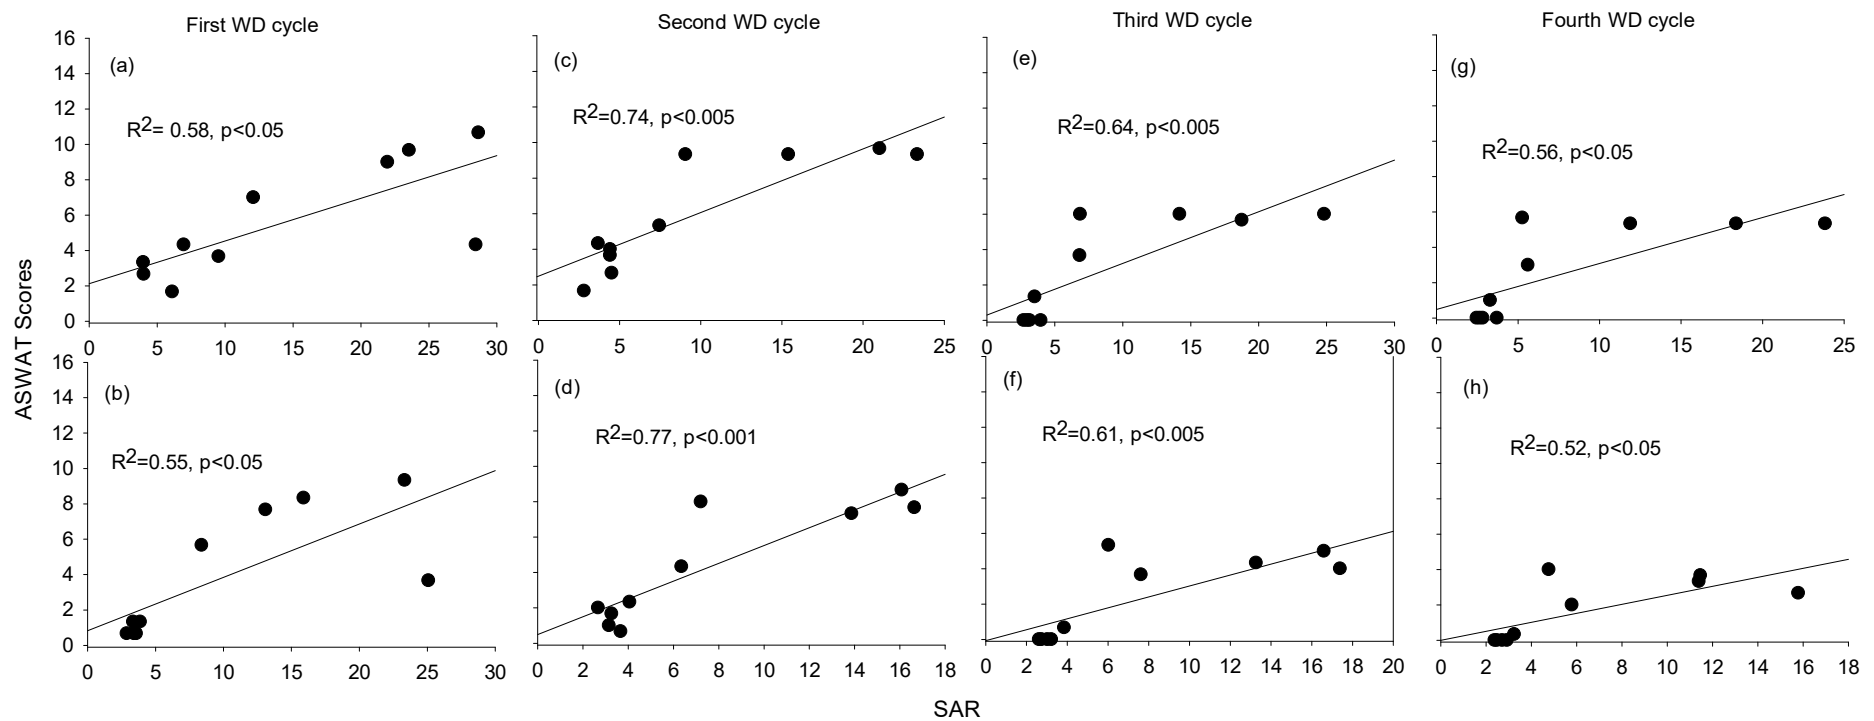

Fig. S7. Relationship of clay dispersion as measured by ASWAT with SAR; Soil 1 (a, c, e, and g) Soil 2 (b, d, f, and h). Graph (a) and (b) represents the relationship between ASWAT, and SAR after first wetting and drying (WD) cycle. Graph (c) and (d) represents the relationship between ASWAT and SAR after second WD cycle. Graph (e) and (f) represents the relationship between ASWAT and SAR after third WD cycle, and graph (g) and (h) represents the relationship between ASWAT and SAR after fourth WD cycle. The line on each graph is showing the linear regression line. Each point on graph represents the means of three replicates of each of ten treatments.
